# Supplementary material for: Memory for Lectures: How Lecture Format Impacts the Learning Experience
Source: PubMed Central journal article supplement (PMC4641615; doi:10.1371/journal.pone.0141587), 2015-11-11

A)

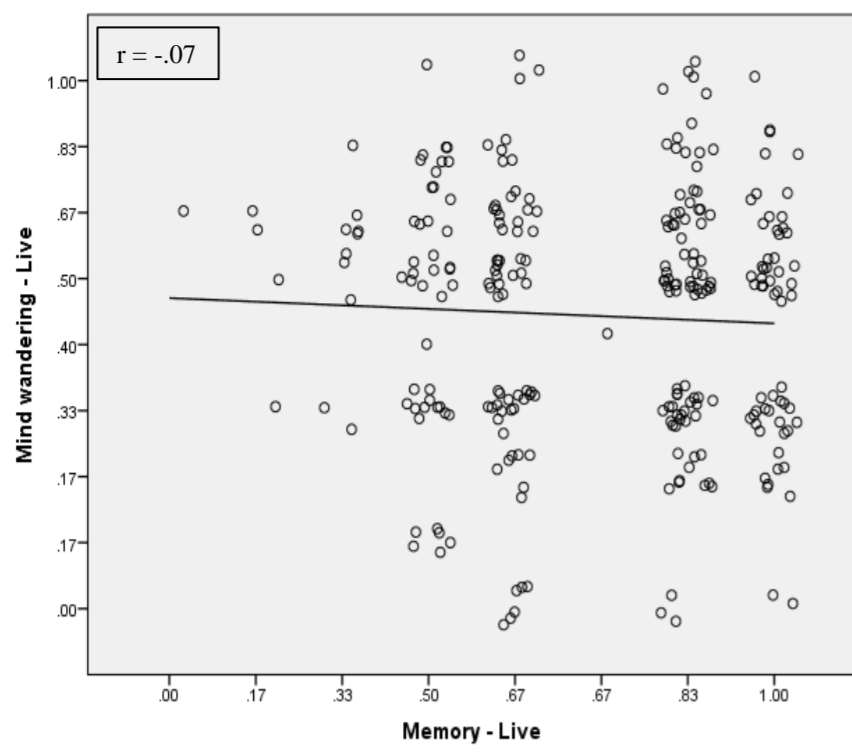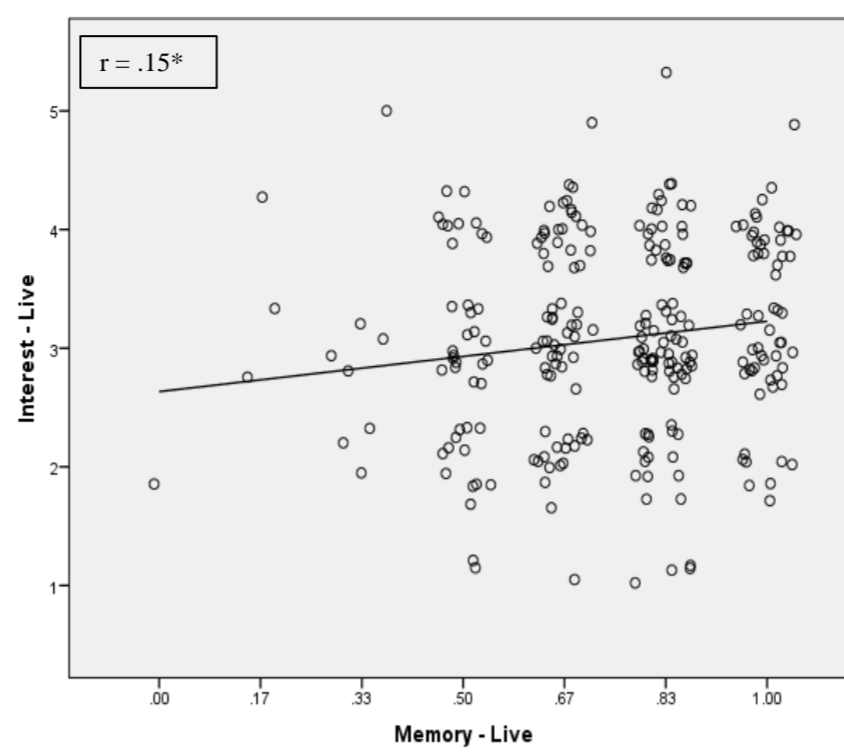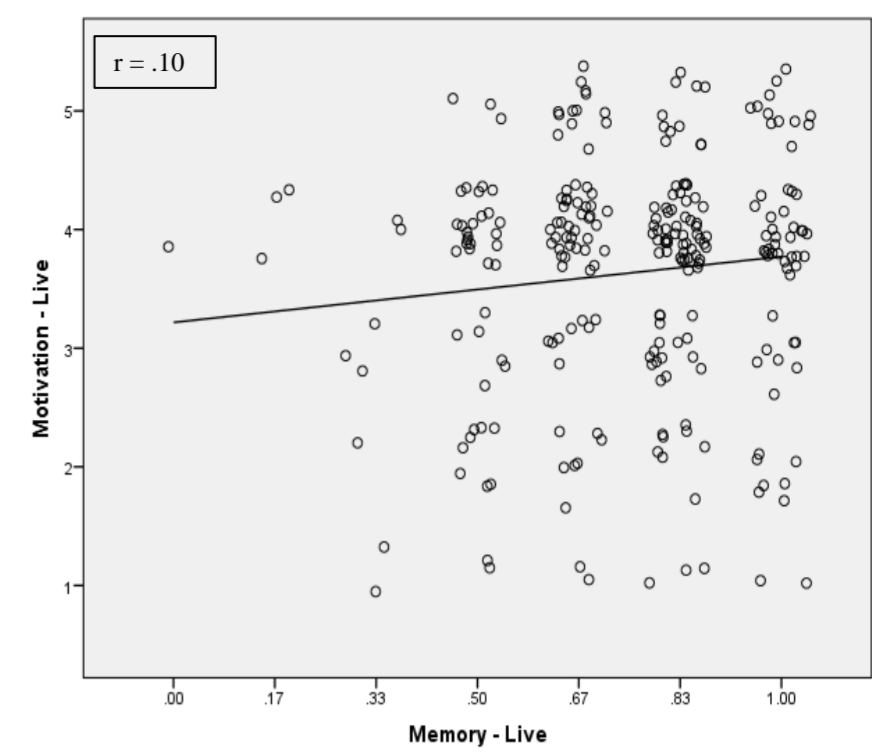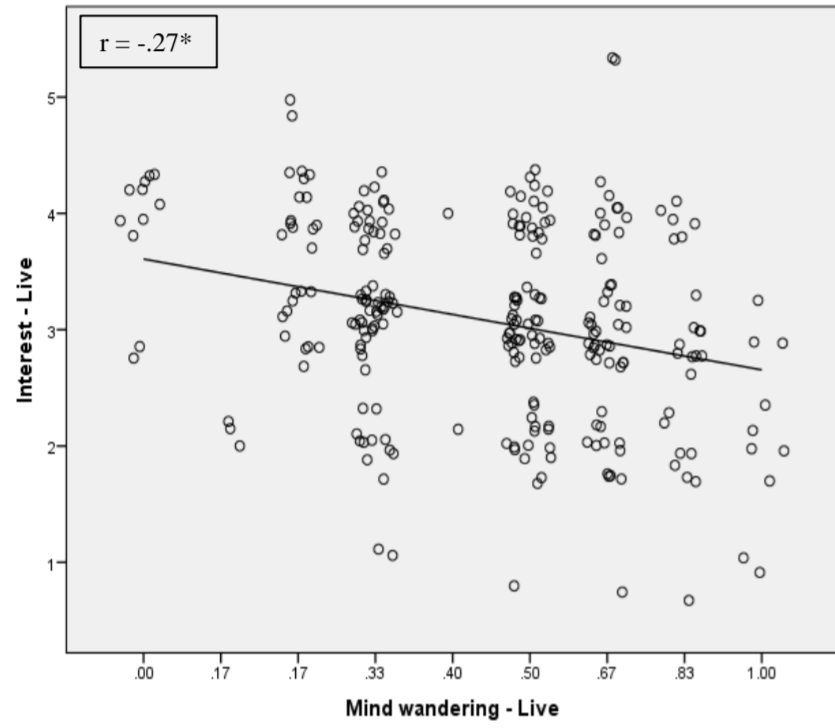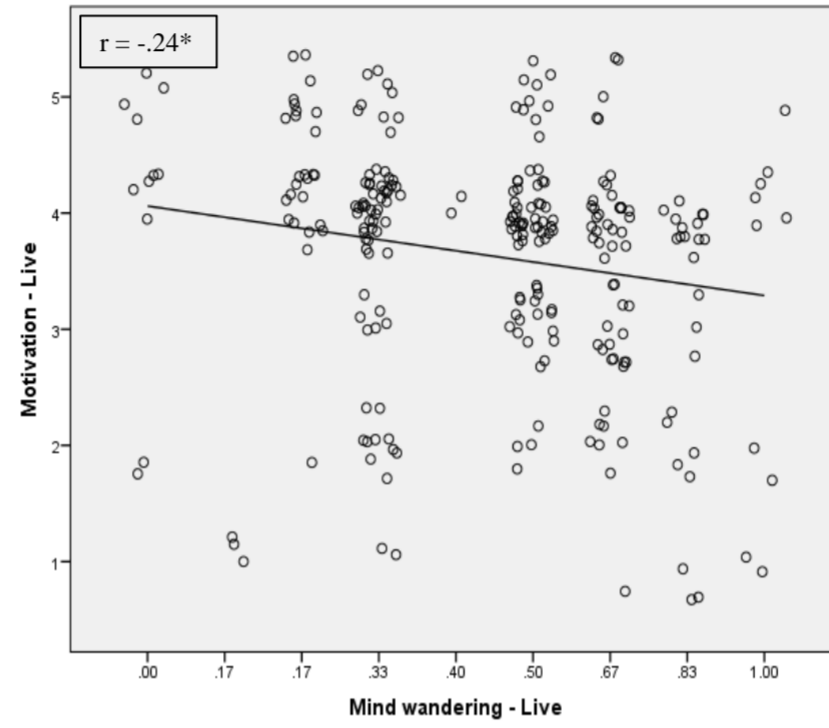

B)

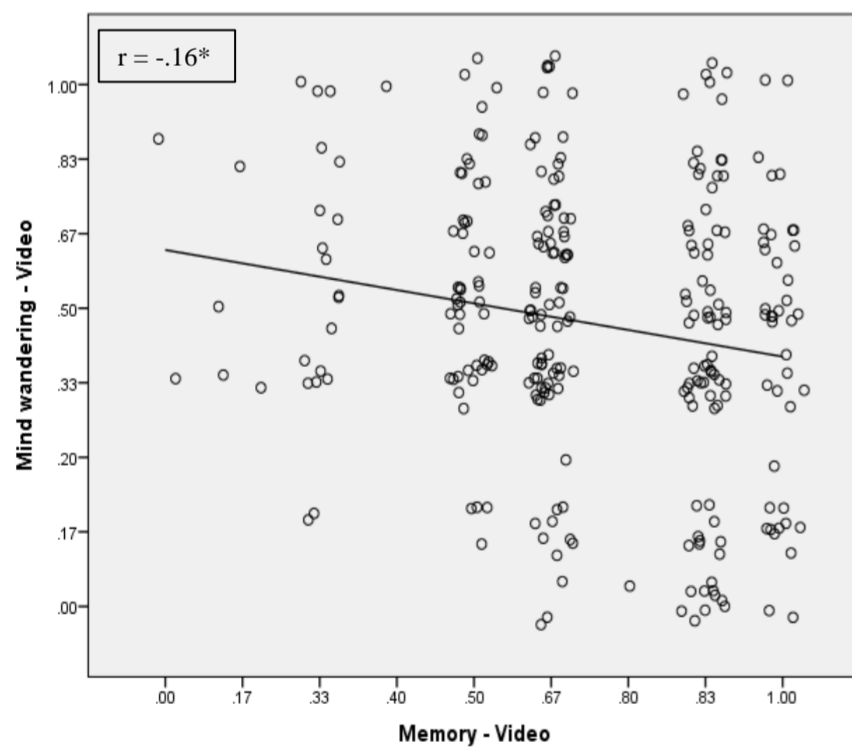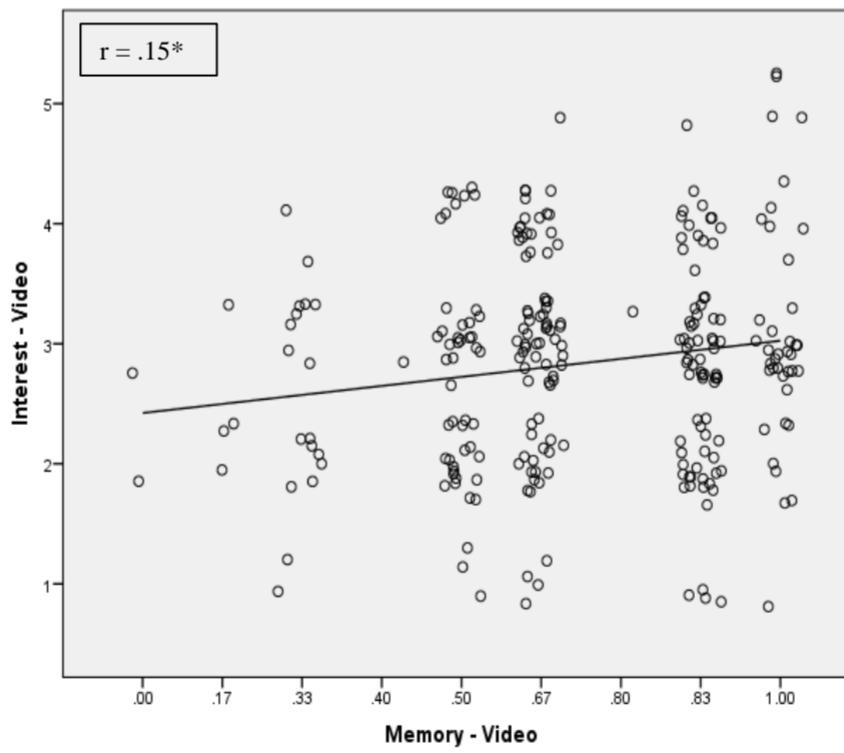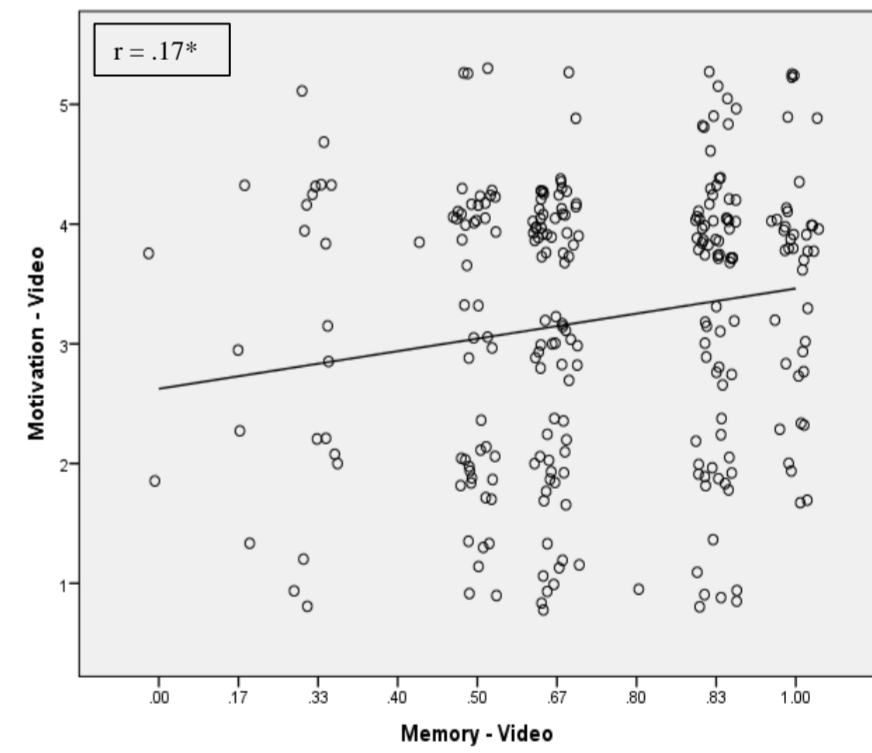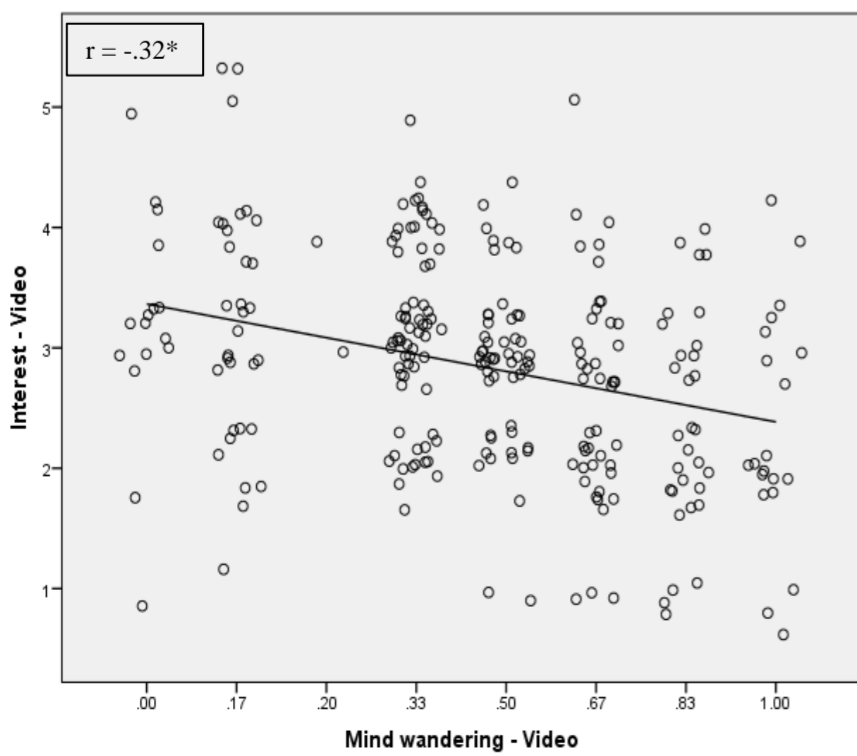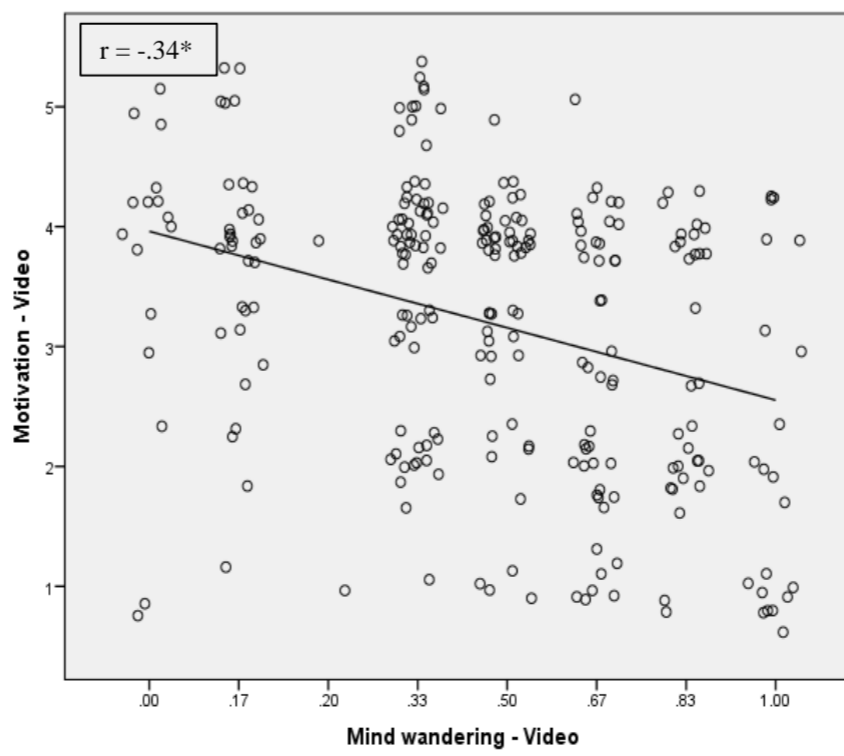

Supplement: pone.0141587.s003.pdf [file pone.0141587.s003.pdf]
